1 **Blunted Fas signaling favors RIPK1-driven neutrophil necroptosis in**  
2 **critically ill COVID-19 patients**

3

4 Tiziano A. Schweizer<sup>\*a</sup>, Srikanth Mairpady Shambat<sup>\*a</sup>, Clément Vulin<sup>a</sup>, Sylvia Hoeller<sup>b</sup>, Claudio  
5 Acevedo<sup>a</sup>, Markus Huemer<sup>a</sup>, Alejandro Gomez-Mejia<sup>a</sup>, Chun-Chi Chang<sup>a</sup>, Jeruscha Baum<sup>a</sup>, Sanne  
6 Hertegonne<sup>a</sup>, Eva Hitz<sup>a</sup>, Daniel A. Hofmaenner<sup>c</sup>, Philipp K. Buehler<sup>c</sup>, Holger Moch<sup>b</sup>, Reto A.  
7 Schuepbach<sup>c</sup>, Silvio D. Brugger<sup>a</sup> and Annelies S. Zinkernagel<sup>a</sup>

8

9 a, Department of Infectious Diseases and Hospital Epidemiology, University Hospital of Zurich,  
10 University of Zurich, Zurich 8091, Switzerland

11 b, Department of Pathology and Molecular Pathology, University Hospital of Zurich, University of  
12 Zurich, Zurich 8091, Switzerland

13 c, Institute for Intensive Care Medicine, University Hospital of Zurich, University of Zurich, Zurich  
14 8091, Switzerland

15

16 \*TA. Schweizer and S. Mairpady Shambat contributed equally to this paper

17

18 **Corresponding author**

19 Annelies S. Zinkernagel

20 [annelies.zinkernagel@usz.ch](mailto:annelies.zinkernagel@usz.ch)

21

22

23 **Key words:** COVID-19, neutrophils, cell death, Fas, RIPK1

24

25

26

27

28

29

30

31

32

33

34

35

36

37

38 **Abstract**

39 Critically ill COVID-19 patients are characterized by a severely dysregulated cytokine profile and  
40 elevated neutrophil counts, which are thought to contribute to disease severity. However, to date it  
41 remains unclear how neutrophils contribute to pathophysiology during COVID-19. Here, we  
42 assessed the impact of the dysregulated cytokine profile on the tightly regulated cell death program  
43 of neutrophils. We show that in a subpopulation of neutrophils, canonical apoptosis was skewed  
44 towards rapidly occurring necroptosis. This phenotype was characterized by abrogated caspase-8  
45 activity and increased RIPK1 levels, favoring execution of necroptosis via the RIPK1-RIPK3-MLKL  
46 axis, as further confirmed in COVID-19 biopsies. Moreover, reduction of sFas-L levels in COVID-19  
47 patients and hence decreased signaling to Fas directly increased RIPK1 levels and correlated with  
48 disease severity. Our results suggest an important role for Fas signaling in the regulation of cell  
49 death program ambiguity via the ripoptosome in neutrophils during COVID-19 and a potential  
50 therapeutic target to curb inflammation and thus influence disease severity and outcome.

51

52

53

54

55

56

57

58

59

60

61

62

63

64

65

66

67

68

69

70

71

72

73

## 74 **Introduction**

75 Patients experiencing the severe form of coronavirus disease 2019 (COVID-19), caused by SARS-  
76 CoV-2, are at elevated risk for succumbing to respiratory failure, which is linked to elevated mortality  
77 (Huang et al., 2020; Wunsch, 2020; Wendel Garcia et al., 2020). The current state of knowledge  
78 indicates a strongly dysregulated immune response during critical COVID-19, involving different  
79 forms of regulated cell death (RCD), which affects a broad range of cell types, including neutrophils  
80 (Adamo et al., 2020; Althaus et al., 2020; Nagashima et al., 2020; Varga et al., 2020; Rodrigues et  
81 al., 2020; Middleton et al., 2020; Karki et al., 2021).

82 Death of neutrophils is a tightly regulated process. They usually die via apoptosis and are removed  
83 by efferocytosis (Lawrence et al., 2020). Lately, neutrophils have been investigated mostly for their  
84 capacity to employ extracellular traps (NETs), chromatin-based webs spiked with nuclear and  
85 cytosolic components, to trap and eliminate pathogens (Branzk et al., 2014). However, NETs have  
86 also been linked to a variety of non-infectious diseases, responsible for tissue-injury (Nakazawa et  
87 al., 2018). Inconclusive evidence suggests that neutrophils might contribute to immunothrombosis  
88 and lung-injury in critical COVID-19 due to higher rates of NETs, as indicated by the presence of  
89 either extracellular DNA co-localized with myeloperoxidase (MPO), citrullinated histones or elastase  
90 in tracheal aspirates and histological lung sections (Middleton et al., 2020; Radermecker et al., 2020;  
91 Nathan, 2020; Protasio Veras et al., 2020). However, intracellular content might also be released  
92 during regulated necrosis, termed necroptosis (D'Cruz et al., 2018; Nakazawa et al., 2018).  
93 Necroptosis, as well as apoptosis, is initiated by ripoptosome assembly. The ripoptosome is a  
94 multiprotein signaling complex which can either induce apoptosis, necroptosis or promote cell  
95 survival, depending on its stoichiometric composition of the key components receptor interacting  
96 serine-threonine protein kinase (RIPK) 1, caspase-8, Fas associated protein with death domain  
97 (FADD) and cellular FADD-like IL-1 $\beta$ -converting enzyme inhibitory protein (cFLIP) isoforms  
98 (Feoktistova et al., 2011). In case of stabilized RIPK1, necroptosis is driven by RIPK1-RIPK3  
99 necrosome formation and subsequent activation of the mixed lineage kinase like (MLKL) (Schilling  
100 et al., 2014), inducing cell rupture (Orozco et al., 2014; Wang et al., 2016). Assembly and  
101 functionality of the ripoptosome is strictly regulated, amongst others by the Fas/Fas-Ligand (Fas-L)  
102 system (Tummers et al., 2020). However, whether skewed RCD mechanisms of neutrophils  
103 contribute towards augmenting tissue injury and inflammation in COVID-19 is still not well  
104 understood. Importantly, given that neutrophil counts are significantly elevated in critically ill COVID-  
105 19 patients, necroptosis could possibly contribute to severe inflammation in these patients.

106 Here, we report that neutrophils undergo rapid necroptosis, due to increased RIPK1-dominant  
107 ripoptosome function and execution of necroptosis via RIPK3-MLKL, elicited by impaired Fas/soluble  
108 Fas-L (sFas-L) signaling in critically ill COVID-19 patients, which correlated with disease severity.

109

110

111

## 112 **Results and discussion**

### 113 **Acute phase plasma from critically ill COVID-19 patients induces lytic regulated cell death in** 114 **neutrophils**

115 To investigate the fate of neutrophil cell death during COVID-19, we looked at critically ill patients  
116 enrolled in our prospective intensive care unit (ICU) cohort (**Table S1**). Neutrophils were isolated  
117 within the first four days upon ICU admission (acute phase). In parallel, neutrophils from healthy  
118 donors were isolated. Neutrophils were stimulated with auto- or heterologous plasma and assessed  
119 for short term viability using flow cytometry (**Fig. 1A and B, S1A**). Stimulation with acute phase  
120 COVID-19 plasma decreased the proportion of live cells and increased the proportion of RCD, as  
121 indicated by Annexin V positive staining, of both COVID-19 and healthy donor neutrophils. (**Fig. 1B**  
122 **and C**). Furthermore, pre-stimulation with COVID-19 plasma and subsequent bacterial challenge  
123 underscored the cell-death prone phenotype of both COVID-19 and healthy donor neutrophils in the  
124 COVID-19 environment, simulated by addition of COVID-19 plasma (**Fig. S1B**). In contrast,  
125 neutrophils from the same COVID-19 patients during recovery phase (discharged from ICU or SARS-  
126 CoV-2 negative in a non-critical state), or healthy donor neutrophils stimulated with recovery phase  
127 plasma, displayed no difference in proportion of viable and dying cells, as compared to stimulation  
128 with healthy plasma (**Fig. 1D**), highlighting a transient effect of acute phase COVID-19 plasma on  
129 RCD induction in neutrophils.

130 To characterize the type of RCD the neutrophils succumbed to, we employed time lapse microscopy,  
131 using the cell-permeable DNA-dye Hoechst and the cell-impermeable DNA-dye SYTOX™ green.  
132 This approach revealed that COVID-19 plasma stimulation induced lytic RCD, linked to expulsion of  
133 DNA around the lysed cells, but distinct from classical NETs formation, while less cell lysis was  
134 observed upon stimulation with healthy plasma (**Fig. 1E, S1, C and D, Video 1 and 2**). This was in  
135 accordance with findings by Middleton et al., describing increased release of DNA from *ex vivo*  
136 cultured COVID-19 or healthy donor neutrophils stimulated with COVID-19 plasma, which they  
137 determined to be NETs (Middleton et al., 2020). Recently, we showed that neutrophils from COVID-  
138 19 patients released significantly fewer NETs upon bacterial challenge, the main natural inducer of  
139 NETs (Van Der Linden et al., 2017), questioning the presence of classical NETs in COVID-19  
140 (Mairpady Shambat et al., 2020; Nathan, 2020). Protasio Veras et al. showed that SARS-CoV-2 can  
141 infect neutrophils, and viral replication caused release of NETs, thereby describing a situation  
142 different from cytokine-induced DNA release (Protasio Veras et al., 2020). The sensitivity of our  
143 method was further verified by neutrophils from a COVID-19 patient concomitantly treated with  
144 tamoxifen (**Fig. S1E**). Tamoxifen has been shown to augment the innate immune function of  
145 neutrophils as well as increase NETs formation (Corriden et al., 2015). In line with these previous  
146 findings, classical NETs (**Fig. S1F**) and apoptotic bodies were observed (**Fig. S1, G and H**). We  
147 analyzed cell death kinetics as proportion of SYTOX+ cells over time (**Fig. 1F and S2, A, B and C**)  
148 and verified that COVID-19 neutrophils died at a higher rate when stimulated with auto- as compared

149 to heterologous plasma, resulting in a significantly increased proportion of dead cells (**Fig. 1, F, G**  
150 **and H**).

151

### 152 **COVID-19 plasma favors RIPK1-dominant ripoptosome phenotype**

153 Since neutrophils usually die via caspase mediated apoptosis, we assessed whether caspases might  
154 be involved in the observed lytic RCD. Interestingly, caspase inhibition showed no effect on short  
155 term survival of neutrophils stimulated with COVID-19 plasma, confirming that neutrophils underwent  
156 caspase independent lytic RCD (**Fig. 2, A, B and S2D**). However, caspase blockage did not show  
157 any effect on short term survival upon healthy plasma stimulation, potentially due to the fact that  
158 caspases are usually only activated later on during the lifespan of neutrophils (Schwartz et al., 2012).  
159 Therefore, we also assessed long term survival in the COVID-19 and healthy plasma environment.  
160 Here, we found that COVID-19 plasma had rather the opposite outcome on long term as compared  
161 to short term stimulation, with higher proportions of neutrophils surviving as compared to healthy  
162 plasma (**Fig. 2, C and D**). Caspase inhibition was able to significantly elevate the proportion of  
163 surviving neutrophils in general. However, this effect was significantly lower when stimulated with  
164 COVID-19 plasma as compared to healthy plasma (**Fig. S2D**). This might be explained by elevated  
165 levels of G-CSF, GM-CSF and IL-8 during COVID-19 (Mairpady Shambat et al., 2020), which were  
166 described to interfere with caspase activation (van Raam et al., 2008; Klein et al., 2000). Additionally,  
167 certain viruses are known to secrete caspase-8 interfering peptides (Mocarski et al., 2012), which  
168 might also apply to SARS-CoV-2.

169 A caspase-impaired environment might favor the occurrence of necroptosis over apoptosis.  
170 Necroptosis is described to differ from apoptotic cell death by release of damage associated  
171 molecular patterns (DAMPs) known to trigger inflammation and decreased release of classical  
172 cytokines, such as members of the TNF superfamily for neutrophils (Kearney and Martin, 2017).  
173 Therefore, we assessed the secretion of selected DAMPs and cytokines. COVID-19 plasma  
174 stimulation resulted in significantly higher lactate dehydrogenase (LDH), DNA, S100A8/A9 and  
175 calreticulin (CALR) release as well as slightly elevated MPO as compared to healthy plasma  
176 stimulation (**Fig. 2, E and F**). DAMPs, especially S100A8/A9, have previously been described to be  
177 important drivers of COVID-19 pathogenesis (Guo et al., 2021). Furthermore, decreased levels of  
178 TNF- $\alpha$  and TRAIL were detected (**Fig. 2G**), confirming a necroptotic secretion profile (Alvarez-Diaz  
179 et al., 2016; Newton et al., 2016). Of note, effectors of apoptosis and necroptosis are found within  
180 the ripoptosome, the decisive complex for activation of either pathway (Chen et al., 2018; Duprez et  
181 al., 2012; Feoktistova et al., 2011). In order to understand the modus operandi of the ripoptosome,  
182 we assessed intracellular RIPK1 levels as well as caspase-8 activity. Neutrophils derived directly  
183 from COVID-19 patients stimulated with autologous plasma displayed significantly higher RIPK1  
184 levels (**Fig. 2H**) and at the same time decreased caspase-8 activity (**Fig. 2I**) as compared to healthy  
185 plasma stimulation. If either caspase-8 homodimerization or caspase-8 cFLIP<sub>L</sub> heterodimerization  
186 occurs, the resulting caspase-8 activity will be sufficient to degrade RIPK1 and prevent necrosome

187 assembly (Schilling et al., 2014). However, increased RIPK1 levels and decreased caspase-8 activity  
188 upon COVID-19 plasma stimulation strongly suggested a RIPK1-dominant ripoptosome, favoring  
189 necrosome assembly and execution of necroptosis.

190

## 191 **Evidence for RIPK1-RIPK3-MLKL driven neutrophil necroptosis in COVID-19 thrombus and** 192 **lung tissue**

193 Critical COVID-19 is linked to endothelial damage and neutrophil-rich thrombi (Varga et al., 2020;  
194 Middleton et al., 2020). Therefore, we assessed whether neutrophil necroptosis occurred in COVID-  
195 19 thrombi by immunostaining for the necroptosis markers RIPK1, RIPK3 and MLKL (**Table S2**).  
196 Histological analysis within thrombus biopsies of two COVID-19 patients showed strong positive  
197 RIPK1, RIPK3 and MLKL staining for neutrophils (**Fig. 2J**), further corroborating the observed  
198 necroptotic *ex vivo* phenotype of neutrophils in the COVID-19 environment. We also observed  
199 evidence for neutrophil necroptosis in a thrombus from a non-COVID-19 patient (**Fig 2J**), in line with  
200 previous reports of activated platelets, driving neutrophil necroptosis (Nakazawa et al., 2018).

201 Furthermore, we assessed whether neutrophil necroptosis might also occur during the severe lung  
202 pathology observed in critical COVID-19. Indeed, we discovered strong positive staining of general  
203 necroptosis markers in lung biopsy tissue (**Fig. S3A**), and especially strong positive staining for  
204 neutrophils (**Fig. 2K**). Interestingly, neutrophils were always strongly stained for RIPK1, RIPK3 and  
205 MLKL within blood vessels (**Fig. S3B**), pointing towards contribution of neutrophil necroptosis within  
206 thrombi in the lung and its devastating effect during critical COVID-19 resulting in respiratory failure.  
207 Our histological findings are in line with studies showing that intracellular neutrophil content found in  
208 tissue can be released during necroptosis via the RIPK1-RIPK3-MLKL axis (Desai et al., 2016a). Of  
209 note, neutrophil necroptosis seems to be not uniquely attributable to COVID-19, as it has been  
210 described to occur during *S. aureus* pneumonia (Greenlee-Wacker et al., 2014; Zhou et al., 2018)  
211 and might be a phenomenon also influencing influenza A pneumonia (Zhu et al., 2018; Narasaraju  
212 et al., 2011), as well as in thrombus formation in general (Laridan et al., 2017), where NETs have  
213 been implied. There is accumulating evidence that DNA release after MLKL-mediated necroptosis  
214 and NETs formation via peptidylarginine deiminase 4 (PAD4) upon bacterial challenge differ  
215 drastically, especially in the light that neutrophils remain alive after NETs formation, but not after  
216 necroptosis (Branzk et al., 2014; Van Der Linden et al., 2017; Yipp et al., 2012). Controversially,  
217 MLKL was also reported to be able to activate PAD4 and cause NETs formation upon bacterial  
218 challenge (D'Cruz et al., 2018), highlighting the fact that DNA aggregates or NETs can be released  
219 via different mechanisms upon distinct stimuli, but might ultimately result in a similar outcome (Wang  
220 et al., 2018; Desai et al., 2016b). However, the interplay between the necroptotic cell death and  
221 NETs pathway remains to be elucidated.

222

223

224

## 225 **Abrogated Fas engagement favors high RIPK1 levels**

226 Next, we sought to investigate the signaling modalities contributing towards RIPK1 mediated  
227 neutrophil necroptosis in COVID-19. Early on, COVID-19 has been characterized by a highly  
228 dysbalanced cytokine profile (Chevrier et al., 2021; Schulte-Schrepping et al., 2020), suggesting that  
229 the presence of host-derived mediators of ripoptosome function might also be altered. In our recently  
230 described COVID-19 ICU cohort, we detected significantly elevated TNF- $\alpha$  and IFN- $\alpha$  levels, both  
231 known to modulate RCD (Mairpady Shambat et al., 2020). However, the expression of the TNF RI  
232 and IFNAR1 receptor on neutrophils from COVID-19 patients and healthy donors showed no  
233 difference, minimizing their potential pivotal role (**Fig. S3C**).

234 Two other well-known death receptor pathways are Fas/Fas-L and TRAIL-R1/TRAIL. We found  
235 significantly lower sFas-L concentrations in plasma from COVID-19 patients as compared to healthy  
236 donors, which was in line with a recent study (Abers et al., 2021), and equal levels of TRAIL (**Fig.**  
237 **3A**). Importantly, during the recovery phase of these patients, the concentration of sFas-L was  
238 significantly higher as compared to their acute phase, reaching levels of healthy donors (**Fig. S3D**).  
239 Assessing the corresponding receptors, Fas and TRAIL-R1, we observed significantly higher Fas  
240 expression on neutrophils derived from COVID-19 patients as compared to healthy donors, whereas  
241 TRAIL-R1 expression displayed no difference (**Fig. 3B**). It has only recently been described that Fas  
242 expression is also significantly elevated on T cells in COVID-19 (Bellesi et al., 2020; Filbin et al.,  
243 2020; Schultheiß et al., 2020; Zhu et al., 2020). The signaling modality of Fas-L to Fas during  
244 inflammation, but also homeostasis, is still not completely understood. Fas-L can occur as sFas-L  
245 but also as membrane-bound (mFas-L) (Herrero et al., 2011). sFas-L can either induce or prevent  
246 cell death, depending on various environmental factors, whereas mFas-L is solely thought to induce  
247 cell death (Hohlbaum et al., 2000; Nguyen and Russell, 2001; Suda et al., 1997; Tummers et al.,  
248 2020). Interestingly, the supernatant of COVID-19 neutrophils contained significantly lower  
249 concentrations of sFas-L when stimulated with auto- as compared to heterologous plasma (**Fig. 3C**).  
250 Flow cytometry analysis revealed that neutrophils stimulated with COVID-19 plasma produced  
251 significantly lower levels of Fas-L (**Fig. 3D**), confirming previous results that neutrophils express and  
252 secrete Fas-L (Serrao et al., 2001). It remains to be elucidated which other cell types apart from  
253 neutrophils contribute to the sFas-L pool found in steady state conditions and how their secretion  
254 profile is affected during COVID-19.

255 We reasoned that sFas-L might be beneficial for survival of COVID-19 neutrophils. Indeed, addition  
256 of recombinant human sFas-L to COVID-19 neutrophils significantly increased the proportion of live  
257 cells and decreased RCD induction in the COVID-19 environment (**Fig. 3, E and F**). Blocking sFas-  
258 L from binding to Fas by employing a Fas-blocking antibody on the other hand increased the rate of  
259 RCD significantly, also during healthy plasma stimulation, confirming that binding of sFas-L to Fas  
260 is required for enhanced survival of COVID-19 neutrophils (**Fig. 3, G and H**). Next, we assessed  
261 whether sFas-L stimulation influenced RIPK1 levels and caspase-8 activity. Indeed, we found that  
262 treatment with sFas-L decreased RIPK1 levels significantly during COVID-19, but not healthy,

263 plasma stimulation (**Fig. 3I**). This occurred independently of caspase-8 (**Fig. 3J**) and caspase-3/7  
264 activity (**Fig. 3K**), suggesting that sFas-L acted as a pro-survival signal in the COVID-19  
265 environment.

266

### 267 **Low sFas-L levels correlate with disease severity**

268 Finally, we evaluated whether sFas-L levels, and hence neutrophil necroptosis, correlated with  
269 clinical status of the corresponding patients. Analysis of key markers for COVID-19 severity, i.e.  
270 neutrophil to lymphocyte ratio (NLR), monocyte counts, IL-6, CRP, bilirubin, platelet counts, length  
271 of ventilation (LOV) and length of ICU stay (LOS) (Qin et al., 2020; Carissimo et al., 2020; Hazard et  
272 al., 2020) to sFas-L levels did not display any significant correlation (**Fig. S3, E-L**). Of note, on the  
273 17<sup>th</sup> of July 2020, the RECOVERY trial showed reduced 28-day mortality in ventilated COVID-19  
274 patients treated with dexamethasone (Horby et al., 2020), which then became standard of care  
275 (SOC) also at the University Hospital Zurich's (USZ) ICU. Since dexamethasone is known to impact  
276 neutrophil functions and lifespan (Ronchetti et al., 2018), we performed an in-depth analysis  
277 comparing patients treated at attending physicians' discretion (USZ SOC) or RECOVERY SOC. We  
278 identified significant negative correlation between sFas-L levels and NLR (**Fig. 4A**) but not monocyte  
279 counts (**Fig. 4B**), as well as IL-6 (**Fig. 4C**), but not CRP (**Fig. 4D**) in the USZ SOC group. These  
280 findings might suggest that neutrophil necroptosis due to decreased sFas-L levels favors an  
281 inflammation feedback loop with a central role for IL-6 signaling, potentially sustaining emergency  
282 granulopoiesis and aborting lymphopoiesis, which would explain the increased NLR (Maeda et al.,  
283 2009). However, this remains speculative and further research is needed to clarify how decreased  
284 sFas-L impacts viability of lymphocytes. Furthermore, low sFas-L levels also correlated with high  
285 bilirubin levels (**Fig. 4E**) and low platelet counts (**Fig. 4F**), further highlighting the devastating effect  
286 of neutrophil necroptosis on coagulation and tissue damage, as has been shown to impact COVID-  
287 19 severity (Liu et al., 2020; Radermecker et al., 2020). In line with these findings, low sFas-L levels  
288 were linked to increased LOV (**Fig. 4G**) and also LOS (**Fig. 4H**) in the USZ SOC group. We observed  
289 no correlation of sFas-L to disease severity in the RECOVERY SOC, even though sFas-L levels  
290 were similar in RECOVERY as well as USZ SOC group (**Fig. S3M**). Synthetic glucocorticoids, such  
291 as dexamethasone, are known to favor neutrophil maturation and tissue retention (Ronchetti et al.,  
292 2018). Therefore, glucocorticoids might ameliorate disease severity by either accelerating neutrophil  
293 maturation or dampening the inflammatory COVID-19 environment, leaving them less prone for  
294 sFas-L dependent necroptosis. Indeed, when comparing the viability of neutrophils from COVID-19  
295 patients treated under USZ or RECOVERY SOC (as shown in **Fig. 1C**), the later showed enhanced  
296 viability (**Fig. S3N**). However, prescription of synthetic glucocorticoids during viral pneumonia is still  
297 controversial, as, among other factors, the timing, dosage and duration of application play an  
298 important role defining the potential beneficial or detrimental effect on patient outcome (Yang et al.,  
299 2020).



300 Although the findings presented in this work were obtained from a small cohort at a single center  
301 only, they nevertheless further elucidate the crucial role of neutrophils during COVID-19 and deliver  
302 novel insights into the important regulation of the ripoptosome by the Fas/Fas-L system and its  
303 correlation to disease severity. Our findings provide hints for future potential therapeutic  
304 development, aiming at restoring the fate of neutrophils and benefiting patient outcome, potentially  
305 also beyond COVID-19.

306

## 307 **Materials and methods**

### 308 **Patients**

309 Patients were recruited between April and December 2020 in the MicrobiotaCOVID prospective  
310 cohort study conducted at the Institute of Intensive Care Medicine of the University Hospital Zurich  
311 (USZ, Zurich, Switzerland) and were included in an extended subcohort as described previously  
312 (Mairpady Shambat et al., 2020; Buehler et al., 2021). The study was approved by the local ethics  
313 committee of the Canton of Zurich, Switzerland (Kantonale Ethikkommission Zurich BASEC ID 2020  
314 – 00646) and is registered at [clinicaltrials.gov](https://clinicaltrials.gov) (ClinicalTrials.gov Identifier: NCT04410263). Patients  
315 were considered to be in the acute phase within the first four days upon initial ICU admission, the  
316 recovery phase was defined as patients being discharged from the ICU or negative for SARS-CoV-  
317 2 and in a non-critical state. Blood sampling was carried out with EDTA tubes. Patient demographics  
318 and clinical as well as laboratory parameters are listed in **Table S1**.

319

### 320 **Plasma collection**

321 EDTA tubes were centrifuged at 1800 rpm for 10 min (no acceleration and brakes) after which the  
322 plasma was separated from the cellular fraction and collected in a fresh tube. The cellular fraction of  
323 the blood was used for neutrophil isolation as described below. The collected plasma was  
324 centrifuged again at 3000 rpm for 10 min (full acceleration and brakes) to pellet debris and the clear  
325 plasma supernatant was collected. Plasma samples were either used directly for the experiments or  
326 aliquoted and frozen at -80°C for cytokine analysis.

327

### 328 **Cytokine analysis**

329 Cytokine levels in plasma from COVID-19 patients and healthy donors, as well as cell culture  
330 supernatants were analyzed on a Luminex™ MAGPIX™ instrument with a custom human cytokine  
331 panel (ThermoFisher). Samples were thawed at room temperature and prepared according to the  
332 manufacturer's instructions. In brief, magnetic beads were added to the 96-well plate on a magnetic  
333 holder and incubated for 2 min. The plate was washed twice with assay buffer for 30 sec each.  
334 Provided standards were diluted in assay buffer or RPMI (Gibco) for analysis of plasma levels or cell  
335 culture supernatants, respectively. Cell culture supernatants were measured undiluted, whereas  
336 plasma samples were diluted 1:2 in assay buffer. The plate was incubated for 2 h at room  
337 temperature (RT) at 550 rpm in an orbital plate shaker. Next, the plate was washed twice and

338 incubated for 30 min at 550 rpm with detection antibodies. Following further washing steps, the plate  
339 was incubated with Streptavidin-PE solution for 30 min at 550 rpm. Finally, the plate was washed,  
340 reading buffer was added and incubated for 10 min at RT and 550 rpm before running the plate.  
341 Analysis was performed using the xPONENT® software. Data was validated additionally with the  
342 ProcartaPlex Analyst software (ThermoFisher).

343

#### 344 **Neutrophils isolation and plasma stimulation**

345 Neutrophils from COVID-19 patients and healthy donors were isolated with the EasySep™ Direct  
346 Human Neutrophil Isolation Kit (StemCell™) according to the manufacturer's instructions. In brief,  
347 the cellular fraction of the blood was diluted 1:2 with Dulbecco's phosphate buffered saline (DPBS,  
348 Gibco) and neutrophil enrichment cocktail was added for 15 min. Next, the magnetic beads were  
349 added for 15 min. The samples were once more diluted 1:2 with DPBS and placed in a magnetic  
350 holder (StemCell) for 15 min. Neutrophils were collected and centrifuged for 1500 rpm (low  
351 acceleration and brakes) for 5 min. Red blood cells lysis was performed with H<sub>2</sub>O and stopped with  
352 DPBS after which the samples were centrifuged. Neutrophils were resuspended in RPMI and  
353 counted on an Attune NxT (ThermoFisher). Neutrophils were either directly stained for cell surface  
354 receptor analysis using flow cytometry or prepared in RPMI containing 10% either auto- or  
355 heterologous plasma and seeded in either V-well canonical plates (Corning, for flow cytometry  
356 analysis) or 8-well microslides (ibidi, for microscopy time lapse). Plates were incubated for 4 h-18 h  
357 at 37°C + 5% CO<sub>2</sub>. For bacterial challenge, plates were incubated for 2.5 h after which neutrophils  
358 were challenged with opsonized (plasma-specific, 20 min at RT) bacteria at MOI 10 for 1.5 h.

359

#### 360 **Bacterial strains**

361 The *Staphylococcus aureus* strain JE2 (MRSA-USA300) (Frey et al., 2021) was grown in Tryptic  
362 Soy Broth at 37°C and 220 rpm for 16 h. Cultures were diluted in fresh TSB and grown to exponential  
363 phase for the challenge. *Streptococcus pneumoniae* (serotype 6B) (Malley et al., 2001) was  
364 passaged twice on blood agar plates (Columbia blood agar, Biomereux) and incubated at 37°C with  
365 5% CO<sub>2</sub>. A liquid culture was prepared in Todd Hewitt Yeast broth with a starting OD<sub>600nm</sub> of 0.1  
366 and grown at 37°C in a water bath until OD<sub>600nm</sub> of 0.35 for the challenge.

367

#### 368 **Cell death analysis by flow cytometry**

369 If indicated, pan-caspase inhibitor Q-VD-Oph (50 µM, Sigma-Aldrich), recombinant human sFas-L  
370 (100 ng/ml, Enzo Lifescience), Ultra-LEAF™ purified anti-human CD95 (FAS) blocking antibody (10  
371 µg/ml, clone A16086F, Biolegend) or respective DMSO and H<sub>2</sub>O control were added prior to  
372 incubation. After the incubation period, plates were centrifuged at 1500 rpm (full acceleration and  
373 brakes) for 6 min. Supernatants were collected for further analyses and the wells were washed once  
374 with FACS buffer (DPBS + 5% fetal calf serum and 1 mM EDTA). Cells were stained with anti-CD66b  
375 APC (G10F5) from ThermoFisher in FACS buffer for 30 min at 4°C. The wells were washed once

376 with Annexin V buffer (Biolegend) and cells were stained with Annexin V FITC and 7AAD (Biolegend)  
377 for 30 min at RT. The plates were acquired on an Attune NxT. The gating strategy is depicted in **Fig.**  
378 **S1A**.

379

### 380 **Lactate dehydrogenase release measurement**

381 Supernatants were incubated 1:2 with the substrate solution of the CytoTox 96® Non-Radioactive  
382 Cytotoxicity Assay (Promega) for 30 min in the dark in a 96-well plate (Greiner), after which the stop  
383 solution was added. The resulting absorbance of the converted substrate due to released lactate  
384 dehydrogenase (LDH) was measured at 490 nm.

385

### 386 **DNA-release measurement**

387 Supernatants were incubated 1:2 with 60nM SYTOX™ Green (ThermoFisher) for 30min at 4°C in a  
388 96-well black bottom plate (Greiner). The fluorescence of the bound DNA was measured in a  
389 fluorescence plate reader (Molecular Probes) with excitation at 488 nm and emission at 520 nm.

390

### 391 **Cell surface receptors and ligand analysis by flow cytometry**

392 To assess intracellular Fas-L levels, GolgiStop™ (BD Biosciences) was added according to the  
393 manufacturer's instruction for 4 h. After the incubation period, plates were centrifuged and washed  
394 once with DPBS. Cells were stained with the Fixable LIVE/DEAD™ Near-IR dead cell marker  
395 (ThermoFisher) in DPBS for 25 min at 4°C. Next, the wells were washed once with FACS buffer and  
396 cells were stained with anti-CD66b APC or PE-Cy7 (G10F5) and anti-IFNAR-1 PE (MAR1-5A3) from  
397 ThermoFisher, anti-Fas BV421 (DX2), anti-TRAIL-R1 APC (DJR1), anti-TNF RI PE (W15099A) all  
398 from Biolegend in FACS buffer for 30 min at 4°C. For intracellular staining, the cells were fixed for  
399 15 min at 4°C in the Fix/Perm Solution A from Fix/perm Kit. Next, staining with anti-Fas-L BV421  
400 (NOK-1) from Biolegend or anti-RIPK1 AF488 (Polyclonal) from Bioss Antibodies was carried out in  
401 Fix/Perm solution B for 30 min at 4°C. The plates were acquired on an Attune NxT.

402

### 403 **Microscopy time lapse**

404 After adding the cells to the microslides, 150 nM SYTOX™ Green (ThermoFisher) and 2 µM Hoechst  
405 33342 (ThermoFisher) were added and the slides were centrifuged at 1500 rpm (low acceleration  
406 and brakes) for 3 min. Microslides were imaged for 4 h at 37°C on a fully automated Olympus IX83  
407 microscope with a 40X objective (UPLFLN40XPH-2), illuminated with a PE-4000 LED system  
408 through a quadband filter set (U-IFCBL50). Eight observation positions per well (condition) were  
409 assigned before the time lapse was started to avoid potential observer bias. The proportion of dead  
410 neutrophils was assessed as described in **Fig. S2A**: after filtering the nuclei on the Hoechst signal  
411 and watershed segmentation, cells were tracked through time and either assigned the category "live"  
412 or "dead" based on the value of the SYTOX Green signal. Assigned dead cells were counted until  
413 the end of the experiment, even after the disappearance of the fluorescent signal. The exponential

414 death rate was fitted from the first few hours of the experiment. Images were processed using ImageJ  
415 software (Schneider et al., 2012).

416

### 417 **Histology**

418 Formalin-fixed paraffin-embedded tissue sections were pre-treated with Tris-EDTA buffer (pH9.0) at  
419 100°C for 30min. Next, they were stained with RIPK1 (ab72139, clone 7H10, dilution 1:1500), RIPK3  
420 (ab62344, polyclonal, dilution 1:100) and MLKL (ab184718, EPR17514, dilution 1:100), all from  
421 abcam for 30 min. For detection, the slides were stained with the Bond Refine Detection Kit (Leica  
422 Biosystems), according to the manufacturer's instruction. Finally, the slides were counterstained with  
423 haematoxylin. For background information of the obtained biopsies, see **Table S2**. The non-COVID-  
424 19 thrombus section was obtained from a patient with a general consent.

425

### 426 **Statistical analyses**

427 The number of donors can be found in the corresponding figure legends. Samples were assessed  
428 for normal distribution. Differences between two groups were calculated using either unpaired t-test,  
429 Mann-Whitney, paired t-test or Wilcoxon signed-rank test in Prism (GraphPad). Correlation of clinical  
430 parameters was computed using non-parametric Spearman correlation in Prism.

431

### 432 **Acknowledgments**

433 We'd like to thank our patients for willing to participate in this study. Furthermore, we'd like to thank  
434 André Fitsche, Christiane Mittmann and Susanne Dettwiler for their help with histology.

435

### 436 **Funding**

437 This work was funded by the SNSF project grant 31003A\_176252 (to A.S.Z), the SNF Biobanking  
438 grant 31BK30\_185401 (to A.S.Z), the Uniscientia Foundation Grant (to A.S.Z), the Swedish Society  
439 for Medical Research (SSMF) foundation grant P17-0179 (to S.M.S), the Promedica Foundation  
440 1449/M (to S.D.B) and unrestricted funds (to R.A.S).

441

442 Author contributions: TA. Schweizer, S. Mairpady Shambat and AS. Zinkernagel conceived the  
443 project and were involved in experimental design. TA. Schweizer performed most experiments,  
444 analyzed and compiled the data with help of S. Mairpady Shambat. C. Vulin performed microscopy  
445 and analysis. M. Huemer, A. Gomez-Mejia, CC. Chang, J. Baum and S. Hertegonne assisted in  
446 experiments and specimen processing. TA. Schweizer prepared the figures with help of C. Vulin. S.  
447 Hoeller and H. Moch performed histology. C. Acevedo, E. Hitz, DA. Hofmaenner, PK. Buehler and  
448 SD. Brugger carried out patient recruitment, collection of patient specimens and epidemiological as  
449 well as clinical data. TA. Schweizer and S. Mairpady Shambat wrote the first draft of the manuscript.  
450 All authors helped in editing the final version of the manuscript and approved it.

451

452 Disclosures: The authors declare no competing financial interests.

453

## 454 References

- 455 Abers, M.S., O.M. Delmonte, E.E. Ricotta, J. Fintzi, D.L. Fink, A.A. Almeida de Jesus, K.A.  
456 Zarembler, S. Alehashemi, V. Oikonomou, J. V. Desai, S.W. Canna, B. Shakoory, K.  
457 Dobbs, L. Imberti, A. Sottini, E. Quiros-Roldan, F. Castelli, C. Rossi, D. Brugnoli, A.  
458 Biondi, L.R. Bettini, M. D'Angio', P. Bonfanti, R. Castagnoli, D. Montagna, A. Licari, G.L.  
459 Marseglia, E.F. Gliniewicz, E. Shaw, D.E. Kahle, A.T. Rastegar, M. Stack, K. Myint-Hpu,  
460 S.L. Levinson, M.J. DiNubile, D.W. Chertow, P.D. Burbelo, J.I. Cohen, K.R. Calvo, J.S.  
461 Tsang, H.C. Su, J.I. Gallin, D.B. Kuhns, R. Goldbach-Mansky, M.S. Lionakis, and L.D.  
462 Notarangelo. 2021. An immune-based biomarker signature is associated with mortality  
463 in COVID-19 patients. *JCI Insight*. 6. doi:10.1172/jci.insight.144455.
- 464 Adamo, S., S. Chevrier, C. Cervia, Y. Zurbuchen, M.E. Raeber, L. Yang, S. Sivapatham, A.  
465 Jacobs, E. Bächli, A. Rudiger, M. Stüssi-Helbling, L.C. Huber, D.J. Schaer, B.  
466 Bodenmiller, O. Boyman, and J. Nilsson. 2020. Lymphopenia-induced T cell proliferation  
467 is a hallmark of severe COVID-19. *bioRxiv*. doi:10.1101/2020.08.04.236521.
- 468 Althaus, K., I. Marini, J. Zlamal, L. Pelzl, A. Singh, H. Häberle, M. Mehrländer, S. Hammer, H.  
469 Schulze, M. Bitzer, N. Malek, D. Rath, H. Bösmüller, B. Nieswandt, M. Gawaz, T.  
470 Bakchoul, and P. Rosenberger. 2020. Antibody-induced procoagulant platelets in severe  
471 COVID-19 infection. *Blood*. doi:10.1182/blood.2020008762.
- 472 Alvarez-Diaz, S., C.P. Dillon, N. Lalaoui, M.C. Tanzer, D.A. Rodriguez, A. Lin, M. Lebois, R.  
473 Hakem, E.C. Josefsson, L.A. O'Reilly, J. Silke, W.S. Alexander, D.R. Green, and A.  
474 Strasser. 2016. The Pseudokinase MLKL and the Kinase RIPK3 Have Distinct Roles in  
475 Autoimmune Disease Caused by Loss of Death-Receptor-Induced Apoptosis. *Immunity*.  
476 45:513–526. doi:10.1016/j.immuni.2016.07.016.
- 477 Bellesi, S., E. Metafuni, S. Hohaus, E. Maiolo, F. Marchionni, S. D'Innocenzo, M. La Sorda,  
478 M. Ferraironi, F. Ramundo, M. Fantoni, R. Murri, A. Cingolani, S. Sica, A. Gasbarrini, M.  
479 Sanguinetti, P. Chiusolo, and V. De Stefano. 2020. Increased CD95 (Fas) and PD-1  
480 expression in peripheral blood T lymphocytes in COVID-19 patients. *Br. J. Haematol*.  
481 95:1–5. doi:10.1111/bjh.17034.
- 482 Branzk, N., A. Lubojemska, S.E. Hardison, Q. Wang, M.G. Gutierrez, G.D. Brown, and V.  
483 Papayannopoulos. 2014. Neutrophils sense microbe size and selectively release  
484 neutrophil extracellular traps in response to large pathogens. *Nat. Immunol*. 15:1017–25.  
485 doi:10.1038/ni.2987.
- 486 Buehler, P.K., A.S. Zinkernagel, D.A. Hofmaenner, P. David, W. Garcia, C.T. Acevedo, A.  
487 Gómez-mejia, S. Mairpady, F. Andreoni, M.A. Maibach, J. Bartussek, M.P. Hilty, P.M.  
488 Frey, R.A. Schuepbach, and S.D. Brugger. 2021. Bacterial pulmonary superinfections  
489 are associated with unfavourable outcomes in critically ill COVID-19 patients. *Cell*  
490 *Reports Med*. 100229. doi:10.1016/j.xcrm.2021.100229.
- 491 Carissimo, G., W. Xu, I. Kwok, M.Y. Abdad, Y.H. Chan, S.W. Fong, K.J. Puan, C.Y.P. Lee,  
492 N.K.W. Yeo, S.N. Amrun, R.S.L. Chee, W. How, S. Chan, B.E. Fan, A.K. Andiappan, B.  
493 Lee, O. Röttschke, B.E. Young, Y.S. Leo, D.C. Lye, L. Renia, L.G. Ng, A. Larbi, and L.F.  
494 Ng. 2020. Whole blood immunophenotyping uncovers immature neutrophil-to-VD2 T-cell

- 495 ratio as an early marker for severe COVID-19. *Nat. Commun.* 11:1–12.  
496 doi:10.1038/s41467-020-19080-6.
- 497 Chen, K.W., K.E. Lawlor, J.B. von Pein, D. Boucher, M. Gerlic, B.A. Croker, J.S. Bezbradica,  
498 J.E. Vince, and K. Schroder. 2018. Cutting Edge: Blockade of Inhibitor of Apoptosis  
499 Proteins Sensitizes Neutrophils to TNF- but Not Lipopolysaccharide-Mediated Cell Death  
500 and IL-1 $\beta$  Secretion. *J. Immunol.* 200:3341–3346. doi:10.4049/jimmunol.1701620.
- 501 Chevrier, S., Y. Zurbuchen, C. Cervia, S. Adamo, M.E. Raeber, N. de Souza, S. Sivapatham,  
502 A. Jacobs, E. Bachli, A. Rudiger, M. Stüssi-Helbling, L.C. Huber, D.J. Schaer, J. Nilsson,  
503 O. Boyman, and B. Bodenmiller. 2021. A distinct innate immune signature marks  
504 progression from mild to severe COVID-19. *Cell Reports Med.* 2.  
505 doi:10.1016/j.xcrm.2020.100166.
- 506 Corriden, R., A. Hollands, J. Olson, J. Derieux, J. Lopez, J.T. Chang, D.J. Gonzalez, and V.  
507 Nizet. 2015. Tamoxifen augments the innate immune function of neutrophils through  
508 modulation of intracellular ceramide. *Nat. Commun.* 6:8369. doi:10.1038/ncomms9369.
- 509 D’Cruz, A.A., M. Speir, M. Bliss-Moreau, S. Dietrich, S. Wang, A.A. Chen, M. Gavillet, A. Al-  
510 Obeidi, K.E. Lawlor, J.E. Vince, M.A. Kelliher, R. Hakem, M. Pasparakis, D.A. Williams,  
511 M. Ericsson, and B.A. Croker. 2018. The pseudokinase MLKL activates PAD4-dependent  
512 NET formation in necroptotic neutrophils. *Sci. Signal.* 11:1–12.  
513 doi:10.1126/scisignal.aao1716.
- 514 Desai, J., S. V. Kumar, S.R. Mulay, L. Konrad, S. Romoli, C. Schauer, M. Herrmann, R. Bilyy,  
515 S. Müller, B. Popper, D. Nakazawa, M. Weidenbusch, D. Thomasova, S. Krautwald, A.  
516 Linkermann, and H.J. Anders. 2016a. PMA and crystal-induced neutrophil extracellular  
517 trap formation involves RIPK1-RIPK3-MLKL signaling. *Eur. J. Immunol.* 46:223–229.  
518 doi:10.1002/eji.201545605.
- 519 Desai, J., S.R. Mulay, D. Nakazawa, and H.J. Anders. 2016b. Matters of life and death. How  
520 neutrophils die or survive along NET release and is “NETosis” = necroptosis? *Cell. Mol.*  
521 *Life Sci.* 73:2211–2219. doi:10.1007/s00018-016-2195-0.
- 522 Duprez, L., M.J.M. Bertrand, T. Vanden Berghe, Y. Dondelinger, N. Festjens, and P.  
523 Vandenabeele. 2012. Intermediate domain of Receptor-interacting Protein Kinase 1  
524 (RIPK1) determines switch between necroptosis and RIPK1 kinase-dependent  
525 apoptosis. *J. Biol. Chem.* 287:14863–14872. doi:10.1074/jbc.M111.288670.
- 526 Feoktistova, M., P. Geserick, B. Kellert, D.P. Dimitrova, C. Langlais, M. Hupe, K. Cain, M.  
527 MacFarlane, G. Häcker, and M. Leverkus. 2011. CIAPs Block Ripoptosome Formation,  
528 a RIP1/Caspase-8 Containing Intracellular Cell Death Complex Differentially Regulated  
529 by cFLIP Isoforms. *Mol. Cell.* 43:449–463. doi:10.1016/j.molcel.2011.06.011.
- 530 Filbin, M.R., A. Mehta, A.M. Schneider, K.R. Kays, and J.R. Guess. 2020. Plasma proteomics  
531 reveals tissue-specific cell death and mediators of cell-cell interactions in severe COVID-  
532 19 patients. *bioRxiv*. doi:10.1101/2020.11.02.365536.

- 533 Frey, P.M., J. Baer, J. Bergada-Pijuan, C. Lawless, P.K. Bühler, R.D. Kouyos, K.P. Lemon,  
534 A.S. Zinkernagel, and S.D. Brugger. 2021. Quantifying Variation in Bacterial  
535 Reproductive Fitness: a High-Throughput Method. *mSystems*. 6:1–13.  
536 doi:10.1128/msystems.01323-20.
- 537 Greenlee-Wacker, M.C., K.M. Rigby, S.D. Kobayashi, A.R. Porter, F.R. DeLeo, and W.M.  
538 Nauseef. 2014. Phagocytosis of *Staphylococcus aureus* by Human Neutrophils Prevents  
539 Macrophage Efferocytosis and Induces Programmed Necrosis. *J. Immunol.* 192:4709–  
540 4717. doi:10.4049/jimmunol.1302692.
- 541 Guo, Q., Y. Zhao, J. Li, J. Liu, X. Yang, X. Guo, M. Kuang, H. Xia, Z. Zhang, L. Cao, Y. Luo,  
542 L. Bao, X. Wang, X. Wei, W. Deng, N. Wang, L. Chen, J. Chen, H. Zhu, R. Gao, C. Qin,  
543 X. Wang, and F. You. 2021. Induction of alarmin S100A8/A9 mediates activation of  
544 aberrant neutrophils in the pathogenesis of COVID-19. *Cell Host Microbe*. 29:222-  
545 235.e4. doi:10.1016/j.chom.2020.12.016.
- 546 Hazard, D., K. Kaier, M. Von Cube, M. Grodd, L. Bugiera, J. Lambert, and M. Wolkewitz. 2020.  
547 Joint analysis of duration of ventilation, length of intensive care, and mortality of COVID-  
548 19 patients: A multistate approach. *BMC Med. Res. Methodol.* 20:1–9.  
549 doi:10.1186/s12874-020-01082-z.
- 550 Herrero, R., X. Fu, T.R. Martin, R. Herrero, O. Kajikawa, G. Matute-bello, Y. Wang, N.  
551 Hagimoto, H. Rosen, R.B. Goodman, X. Fu, and T.R. Martin. 2011. The biological activity  
552 of FasL in human and mouse lungs is determined by the structure of its stalk region. *J*  
553 *Clin Invest*. 121:1174–1190. doi:10.1172/JCI43004.1174.
- 554 Hohlbaum, A.M., S. Moe, and A. Marshak-Rothstein. 2000. Opposing effects of  
555 transmembrane and soluble Fas ligand expression on inflammation and tumor cell  
556 survival. *J. Exp. Med.* 191:1209–1219. doi:10.1084/jem.191.7.1209.
- 557 Horby, P., L. Wei Shen, J.R. Emberson, M. Mafham, J.L. Bell, L. Linsell, N. Staplin, C.  
558 Brightling, A. Ustianowski, E. Elmahi, B. Prudon, C. Green, T. Felton, D. Chadwick, K.  
559 Rege, C. Fegan, L.C. Chappell, S.N. Faust, T. Jaki, K. Jeffery, A. Montgomery, K. Rowan,  
560 E. Juszczak, J.K. Baillie, R. Haynes, and M.J. Landray. 2020. Dexamethasone in  
561 Hospitalized Patients with Covid-19 — Preliminary Report. *N. Engl. J. Med.* 1–11.  
562 doi:10.1056/nejmoa2021436.
- 563 Huang, C., Y. Wang, X. Li, L. Ren, J. Zhao, Y. Hu, L. Zhang, G. Fan, J. Xu, X. Gu, Z. Cheng,  
564 T. Yu, J. Xia, Y. Wei, W. Wu, X. Xie, W. Yin, H. Li, M. Liu, Y. Xiao, H. Gao, L. Guo, J. Xie,  
565 G. Wang, R. Jiang, Z. Gao, Q. Jin, J. Wang, and B. Cao. 2020. Clinical features of  
566 patients infected with 2019 novel coronavirus in Wuhan, China. *Lancet*. 395:497–506.  
567 doi:10.1016/S0140-6736(20)30183-5.
- 568 Karki, R., B.R. Sharma, S. Tuladhar, E.P. Williams, L. Zalduondo, P. Samir, M. Zheng, B.  
569 Sundaram, B. Banoth, R.K.S. Malireddi, P. Schreiner, G. Neale, P. Vogel, R. Webby,  
570 C.B. Jonsson, and T.D. Kanneganti. 2021. Synergism of TNF- $\alpha$  and IFN- $\gamma$  Triggers

- 571 Inflammatory Cell Death, Tissue Damage, and Mortality in SARS-CoV-2 Infection and  
572 Cytokine Shock Syndromes. *Cell*. 184:149-168.e17. doi:10.1016/j.cell.2020.11.025.
- 573 Kearney, C.J., and S.J. Martin. 2017. An Inflammatory Perspective on Necroptosis. *Mol. Cell*.  
574 65:965–973. doi:10.1016/j.molcel.2017.02.024.
- 575 Klein, J.B., M.J. Rane, J.A. Scherzer, P.Y. Coxon, R. Kettritz, J.M. Mathiesen, A. Buridi, and  
576 K.R. McLeish. 2000. Granulocyte-Macrophage Colony-Stimulating Factor Delays  
577 Neutrophil Constitutive Apoptosis Through Phosphoinositide 3-Kinase and Extracellular  
578 Signal-Regulated Kinase Pathways. *J. Immunol.* 164:4286–4291.  
579 doi:10.4049/jimmunol.164.8.4286.
- 580 Laridan, E., F. Denorme, L. Desender, O. François, T. Andersson, H. Deckmyn, K.  
581 Vanhoorelbeke, and S.F. De Meyer. 2017. Neutrophil extracellular traps in ischemic  
582 stroke thrombi. *Ann. Neurol.* 82:223–232. doi:10.1002/ana.24993.
- 583 Lawrence, S.M., R. Corriden, and V. Nizet. 2020. How Neutrophils Meet Their End. *Trends*  
584 *Immunol.* 41:531–544. doi:10.1016/j.it.2020.03.008.
- 585 Van Der Linden, M., G.H.A. Westerlaken, M. Van Der Vlist, J. Van Montfrans, and L. Meyaard.  
586 2017. Differential Signalling and Kinetics of Neutrophil Extracellular Trap Release  
587 Revealed by Quantitative Live Imaging. *Sci. Rep.* 7:1–11. doi:10.1038/s41598-017-  
588 06901-w.
- 589 Liu, Z., J. Li, W. Long, W. Zeng, R. Gao, G. Zeng, D. Chen, S. Wang, Q. Li, D. Hu, L. Guo, Z.  
590 Li, and X. Wu. 2020. Bilirubin Levels as Potential Indicators of Disease Severity in  
591 Coronavirus Disease Patients: A Retrospective Cohort Study. *Front. Med.* 7:1–9.  
592 doi:10.3389/fmed.2020.598870.
- 593 Maeda, K., A. Malykhin, B.N. Teague-Weber, X.H. Sun, A.D. Farris, and K.M. Coggeshall.  
594 2009. Interleukin-6 aborts lymphopoiesis and elevates production of myeloid cells in  
595 systemic lupus erythematosus-prone B6.Sle1.Yaa animals. *Blood*. 113:4534–4540.  
596 doi:10.1182/blood-2008-12-192559.
- 597 Mairpady Shambat, S., A. Gomez-Mejia, T.A. Schweizer, M. Huemer, C. Chang, C. Acevedo,  
598 J. Pijuan Bergada, C. Vulin, N. Miroshnikova, D.A. Hofmänner, P.D. Wendel Garcia, M.P.  
599 Hilty, R.A. Schüpbach, P.K. Bühler, S.D. Brugger, and A.S. Zinkernagel. 2020. Neutrophil  
600 and monocyte dysfunctional effector response towards bacterial challenge in critically-ill  
601 COVID-19 patients. *bioRxiv*. doi:doi.org/10.1101/2020.12.01.406306.
- 602 Malley, R., M. Lipsitch, A. Stack, R. Saladino, G. Fleisher, S. Pelton, C. Thompson, D. Briles,  
603 and P. Anderson. 2001. Intranasal immunization with killed unencapsulated whole cells  
604 prevents colonization and invasive disease by capsulated pneumococci. *Infect. Immun.*  
605 69:4870–4873. doi:10.1128/IAI.69.8.4870-4873.2001.
- 606 Middleton, E.A., X. He, F. Denorme, R.A. Campbell, D. Ng, S.P. Salvatore, M. Mostyka, A.  
607 Baxter-stoltzfus, A.C. Borczuk, M. Loda, M.J. Cody, B.K. Manne, I. Portier, E.S. Harris,  
608 A.C. Petrey, E.J. Beswick, A.F. Caulin, A. Iovino, L.M. Abegglen, A.S. Weyrich, M.T.



- 609 Rondina, M. Egeblad, J.D. Schiffman, C.C. Yost, and M. Elisa. 2020. Neutrophil  
610 extracellular traps contribute to immunothrombosis in COVID-19 acute respiratory  
611 distress syndrome. *Blood*. 136. doi:10.1182/blood.2020007008.
- 612 Mocarski, E.S., J.W. Upton, and W.J. Kaiser. 2012. Viral infection and the evolution of caspase  
613 8-regulated apoptotic and necrotic death pathways. *Nat. Rev. Immunol.* 12:79–88.  
614 doi:10.1038/nri3131.
- 615 Nagashima, S., M.C. Mendes, A.P. Camargo Martins, N.H. Borges, T.M. Godoy, A.F.R.D.S.  
616 Miggiolaro, F. Da Silva Dezydério, C. Machado-Souza, and L. De Noronha. 2020.  
617 Endothelial dysfunction and thrombosis in patients with COVID-19 - Brief report.  
618 *Arterioscler. Thromb. Vasc. Biol.* 40:2404–2407. doi:10.1161/ATVBAHA.120.314860.
- 619 Nakazawa, D., J. Desai, S. Steiger, S. Müller, S.K. Devarapu, S.R. Mulay, T. Iwakura, and  
620 H.J. Anders. 2018. Activated platelets induce MLKL-driven neutrophil necroptosis and  
621 release of neutrophil extracellular traps in venous thrombosis. *Cell Death Discov.* 4.  
622 doi:10.1038/s41420-018-0073-2.
- 623 Narasaraju, T., E. Yang, R.P. Samy, H.H. Ng, W.P. Poh, A.A. Liew, M.C. Phoon, N. Van  
624 Rooijen, and V.T. Chow. 2011. Excessive neutrophils and neutrophil extracellular traps  
625 contribute to acute lung injury of influenza pneumonitis. *Am. J. Pathol.* 179:199–210.  
626 doi:10.1016/j.ajpath.2011.03.013.
- 627 Nathan, C. 2020. Neutrophils and COVID-19: Nots, NETs, and knots. *J. Exp. Med.* 217:3–5.  
628 doi:10.1084/jem.20201439.
- 629 Newton, K., D.L. Dugger, A. Maltzman, J.M. Greve, M. Hedehus, B. Martin-McNulty, R.A.D.  
630 Carano, T.C. Cao, N. Van Bruggen, L. Bernstein, W.P. Lee, X. Wu, J. Devoss, J. Zhang,  
631 S. Jeet, I. Peng, B.S. McKenzie, M. Roose-Girma, P. Caplazi, L. Diehl, J.D. Webster, and  
632 D. Vucic. 2016. RIPK3 deficiency or catalytically inactive RIPK1 provides greater benefit  
633 than MLKL deficiency in mouse models of inflammation and tissue injury. *Cell Death*  
634 *Differ.* 23:1565–1576. doi:10.1038/cdd.2016.46.
- 635 Nguyen, T., and J. Russell. 2001. The regulation of FasL expression during activation-induced  
636 cell death (AICD). *Immunology.* 103:426–434. doi:10.1046/j.1365-2567.2001.01264.x.
- 637 Orozco, S., N. Yatim, M.R. Werner, H. Tran, S.Y. Gunja, S.W.G. Tait, M.L. Albert, D.R. Green,  
638 and A. Oberst. 2014. RIPK1 both positively and negatively regulates RIPK3  
639 oligomerization and necroptosis. *Cell Death Differ.* 21:1511–1521.  
640 doi:10.1038/cdd.2014.76.
- 641 Protasio Veras, F., M. Cornejo Pontelli, C. Meirelles Silva, J.E. Toller-Kawahisa, M. de Lima,  
642 D. Carvalho Nascimento, A. Henriques Schneider, D. Caetite, L. Alves Tavares, I.M.  
643 Paiva, R. Rosales, D. Colon, R. Martins, I. Araujo Castro, G.M. Almeida, M.I. Fernandes  
644 Lopes, M. Nilson Benatti, L. Pastorelli Bonjorno, M. Cavichioli Giannini, R. Luppino-  
645 Assad, S. Luna Almeida, F. Vilar, R. Santana, V.R. Bollela, M. Auxiliadora-Martins, M.  
646 Borges, C. Henrique Miranda, A. Pazin-Filho, L. Lamberti P. da Silva, L. Dias Cunha,

- 647 D.S. Zamboni, F. Dal-Pizzol, L.O. Leiria, L. Siyuan, S. Batah, A. Fabro, T. Mauad, M.  
648 Dolhnikoff, A. Duarte-Neto, P. Saldiva, T. Mattar Cunha, J.C. Alves-Filho, E. Arruda, P.  
649 Louzada-Junior, R. Donizeti Oliveira, and F. Queiroz Cunha. 2020. SARS-CoV-2  
650 triggered neutrophil extracellular traps (NETs) mediate COVID-19 pathology. *J Exp Med.*  
651 217:e20201129. doi:10.1101/2020.06.08.20125823.
- 652 Qin, C., L. Zhou, Z. Hu, S. Zhang, S. Yang, Y. Tao, C. Xie, K. Ma, K. Shang, W. Wang, and  
653 D.S. Tian. 2020. Dysregulation of immune response in patients with coronavirus 2019  
654 (COVID-19) in Wuhan, China. *Clin. Infect. Dis.* 71:762–768. doi:10.1093/cid/ciaa248.
- 655 van Raam, B.J., A. Drewniak, V. Groenewold, T.K. Van Den Berg, and T.W. Kuijpers. 2008.  
656 Granulocyte colony-stimulating factor delays neutrophil apoptosis by inhibition of calpains  
657 upstream of caspase-3. *Blood.* 112:2046–2054. doi:10.1182/blood-2008-04-149575.
- 658 Radermecker, C., N. Detrembleur, J. Guoit, E. Cavalier, M. Henket, C. D’Emal, C. Vanwinge,  
659 D. Cataldo, C. Oury, P. Delvenne, and T. Marichall. 2020. Neutrophil extracellular traps  
660 infiltrate the lung airway, interstitial and vascular compartments in severe Covid-19. *J Exp*  
661 *Med.* 217:e20201012s.
- 662 Rodrigues, T.S., K.S.G. de Sa, A.Y. Ishimoto, A. Becerra, S. Oliveira, L. Almeida, A. V.  
663 Goncalves, D.B. Perucello, W.A. Andrade, R. Castro, F.P. Veras, J.E. Toller-Kawahisa,  
664 D.C. Nascimento, M.H.F. de Lima, C.M.S. Silva, D.B. Caetite, R.B. Martins, I.A. Castro,  
665 M.C. Pontelli, F.C. de Barros, N.B. do Amaral, M.C. Giannini, L.P. Bonjorno, M.I.F. Lopes,  
666 R.C. Santana, F.C. Vilar, M. Auxiliadora-Martins, R. Luppino-Assad, S.C.L. de Almeida,  
667 F.R. de Oliveira, S.S. Batah, L. Siyuan, M.N. Benatti, T.M. Cunha, J.C. Alves-Filho, F.Q.  
668 Cunha, L.D. Cunha, F.G. Frantz, T. Kohlsdorf, A.T. Fabro, E. Arruda, de O.R.D. R, P.  
669 Louzada-Junior, and D.S. Zamboni. 2020. Inflammasomes are activated in response to  
670 SARS-CoV-2 infection and are associated with COVID-19 severity in patients. *J Exp*  
671 *Med.* 218:e20201707.
- 672 Ronchetti, S., E. Ricci, G. Migliorati, M. Gentili, and C. Riccardi. 2018. How glucocorticoids  
673 affect the neutrophil life. *Int. J. Mol. Sci.* 19. doi:10.3390/ijms19124090.
- 674 Schilling, R., P. Geserick, and M. Leverkus. 2014. Characterization of the ripoptosome and its  
675 components: Implications for anti-inflammatory and cancer therapy. 2014. *Methods*  
676 *Enzymol.* 545:83–102. doi: 10.1016/B978-0-12-801430-1.00004-4.
- 677 Schneider, C.A., W.S. Rasband, and K.W. Eliceiri. 2012. NIH Image to ImageJ : 25 years of  
678 image analysis. *Nat. Methods.* 9:671–675. doi:10.1038/nmeth.2089.
- 679 Schulte-Schrepping, J., N. Reusch, D. Paclik, K. Baßler, S. Schlickeiser, B. Zhang, B. Krämer,  
680 T. Krammer, S. Brumhard, L. Bonaguro, E. De Domenico, D. Wendisch, M. Grasshoff,  
681 T.S. Kapellos, M. Beckstette, T. Pecht, A. Saglam, O. Dietrich, H.E. Mei, A.R. Schulz, C.  
682 Conrad, D. Kunkel, E. Vafadarnejad, C.J. Xu, A. Horne, M. Herbert, A. Drews, C.  
683 Thibeault, M. Pfeiffer, S. Hippenstiel, A. Hocke, H. Müller-Redetzky, K.M. Heim, F.  
684 Machleidt, A. Uhrig, L. Bosquillon de Jarcy, L. Jürgens, M. Stegemann, C.R.

- 685 Glösenkamp, H.D. Volk, C. Goffinet, M. Landthaler, E. Wyler, P. Georg, M. Schneider, C.  
686 Dang-Heine, N. Neuwinger, K. Kappert, R. Tauber, V. Corman, J. Raabe, K.M. Kaiser,  
687 M.T. Vinh, G. Rieke, C. Meisel, T. Ulas, M. Becker, R. Geffers, M. Witzenrath, C. Drosten,  
688 N. Suttorp, C. von Kalle, F. Kurth, K. Händler, J.L. Schultze, A.C. Aschenbrenner, Y. Li,  
689 J. Nattermann, B. Sawitzki, A.E. Saliba, L.E. Sander, A. Angelov, R. Bals, A.  
690 Bartholomäus, A. Becker, D. Bezdan, E. Bonifacio, P. Bork, T. Clavel, M. Colome-Tatche,  
691 A. Diefenbach, A. Diltthey, N. Fischer, K. Förstner, J.S. Frick, J. Gagneur, A. Goesmann,  
692 T. Hain, M. Hummel, S. Janssen, J. Kalinowski, R. Kallies, B. Kehr, A. Keller, S. Kim-  
693 Hellmuth, C. Klein, O. Kohlbacher, J.O. Korb, et al. 2020. Severe COVID-19 Is Marked  
694 by a Dysregulated Myeloid Cell Compartment. *Cell*. 182:1419-1440.e23.  
695 doi:10.1016/j.cell.2020.08.001.
- 696 Schultheiß, C., L. Paschold, D. Simnica, M. Mohme, E. Willscher, L. von Wenserski, R. Scholz,  
697 I. Wieters, C. Dahlke, E. Tolosa, D.G. Sedding, S. Ciesek, M. Addo, and M. Binder. 2020.  
698 Next-Generation Sequencing of T and B Cell Receptor Repertoires from COVID-19  
699 Patients Showed Signatures Associated with Severity of Disease. *Immunity*. 53:442-  
700 455.e4. doi:10.1016/j.immuni.2020.06.024.
- 701 Schwartz, J.T., J.H. Barker, J. Kaufman, D.C. Fayram, J.M. McCracken, and L.-A.H. Allen.  
702 2012. Francisella tularensis Inhibits the Intrinsic and Extrinsic Pathways To Delay  
703 Constitutive Apoptosis and Prolong Human Neutrophil Lifespan. *J. Immunol.* 188:3351–  
704 3363. doi:10.4049/jimmunol.1102863.
- 705 Serrao, K.L., J.D. Fortenberry, M.L. Owens, F.L. Harris, and L.A.S. Brown. 2001. Neutrophils  
706 induce apoptosis of lung epithelial cells via release of soluble Fas ligand. *Am. J. Physiol.*  
707 *- Lung Cell. Mol. Physiol.* 280:298–305. doi:10.1152/ajplung.2001.280.2.1298.
- 708 Suda, T., H. Hashimoto, M. Tanaka, T. Ochi, and S. Nagata. 1997. Membrane Fas ligand kills  
709 human peripheral blood T lymphocytes, and soluble fas ligand blocks the killing. *J. Exp.*  
710 *Med.* 186:2045–2050. doi:10.1084/jem.186.12.2045.
- 711 Tummers, B., L. Mari, C.S. Guy, B.L. Heckmann, D.A. Rodriguez, S. Rühl, J. Moretti, J.C.  
712 Crawford, P. Fitzgerald, T.-D. Kanneganti, L.J. Janke, S. Pelletier, J.M. Blander, and D.R.  
713 Green. 2020. Caspase-8-Dependent Inflammatory Responses Are Controlled by Its  
714 Adaptor, FADD, and Necroptosis. *Immunity*. 52:1–13. doi:10.1016/j.immuni.2020.04.010.
- 715 Varga, Z., A.J. Flammer, P. Steiger, M. Haberecker, R. Andermatt, A.S. Zinkernagel, M.R.  
716 Mehra, R.A. Schuepbach, F. Ruschitzka, and H. Moch. 2020. Endothelial cell infection  
717 and endotheliitis in COVID-19. *Lancet*. 395:1417–1418. doi:10.1016/S0140-  
718 6736(20)30937-5.
- 719 Wang, X., Z. He, H. Liu, S. Yousefi, and H.-U. Simon. 2016. Neutrophil Necroptosis Is  
720 Triggered by Ligation of Adhesion Molecules following GM-CSF Priming. *J. Immunol.*  
721 197:4090–4100. doi:10.4049/jimmunol.1600051.

- 722 Wang, X., S. Yousefi, and H.U. Simon. 2018. Necroptosis and neutrophil-Associated disorders  
723 review-Article. *Cell Death Dis.* 9. doi:10.1038/s41419-017-0058-8.
- 724 Wendel Garcia, P.D., T. Fumeaux, P. Guerci, D.M. Heuberger, J. Montomoli, F. Roche-  
725 Campo, R.A. Schuepbach, and M.P. Hilty. 2020. Prognostic factors associated with  
726 mortality risk and disease progression in 639 critically ill patients with COVID-19 in  
727 Europe: Initial report of the international RISC-19-ICU prospective observational cohort.  
728 *EClinicalMedicine.* 25:1–11. doi:10.1016/j.eclinm.2020.100449.
- 729 Wunsch, H. 2020. Mechanical Ventilation in COVID-19: Interpreting the Current Epidemiology.  
730 *Am. J. Respir. Crit. Care Med.* 202:1–4. doi:10.1164/rccm.202004-1385ED.
- 731 Yang, J.W., L. Yang, R.G. Luo, and J.F. Xu. 2020. Corticosteroid administration for viral  
732 pneumonia: COVID-19 and beyond. *Clin. Microbiol. Infect.* 26:1171–1177.  
733 doi:10.1016/j.cmi.2020.06.020.
- 734 Yipp, B.G., B. Petri, D. Salina, C.N. Jenne, B.N.V. Scott, L.D. Zbytniuk, K. Pittman, M.  
735 Asaduzzaman, K. Wu, H.C. Meijndert, S.E. Malawista, A. De Boisleury Chevance, K.  
736 Zhang, J. Conly, and P. Kubes. 2012. Infection-induced NETosis is a dynamic process  
737 involving neutrophil multitasking in vivo. *Nat. Med.* 18:1386–1393. doi:10.1038/nm.2847.
- 738 Zhou, Y., C. Niu, B. Ma, X. Xue, Z. Li, Z. Chen, F. Li, S. Zhou, X. Luo, and Z. Hou. 2018.  
739 Inhibiting PSM $\alpha$ -induced neutrophil necroptosis protects mice with MRSA pneumonia by  
740 blocking the agr system. *Cell Death Dis.* 9. doi:10.1038/s41419-018-0398-z.
- 741 Zhu, L., L. Liu, Y. Zhang, L. Pu, J. Liu, X. Li, Z. Chen, Y. Hao, B. Wang, J. Han, G. Li, S. Liang,  
742 H. Xiong, H. Zheng, A. Li, J. Xu, and H. Zeng. 2018. High Level of Neutrophil Extracellular  
743 Traps Correlates with Poor Prognosis of Severe Influenza A Infection. *J. Infect. Dis.*  
744 217:428–437. doi:10.1093/infdis/jix475.
- 745 Zhu, L., P. Yang, Y. Zhao, Z. Zhuang, Z. Wang, R. Song, J. Zhang, C. Liu, Q. Gao, Q. Xu, X.  
746 Wei, H.X. Sun, B. Ye, Y. Wu, N. Zhang, G. Lei, L. Yu, J. Yan, G. Diao, F. Meng, C. Bai, P.  
747 Mao, Y. Yu, M. Wang, Y. Yuan, Q. Deng, Z. Li, Y. Huang, G. Hu, Y. Liu, X. Wang, Z. Xu, P.  
748 Liu, Y. Bi, Y. Shi, S. Zhang, Z. Chen, J. Wang, X. Xu, G. Wu, F.S. Wang, G.F. Gao, L. Liu,  
749 and W.J. Liu. 2020. Single-Cell Sequencing of Peripheral Mononuclear Cells Reveals Distinct  
750 Immune Response Landscapes of COVID-19 and Influenza Patients. *Immunity.* 53:685-  
751 696.e3. doi:10.1016/j.immuni.2020.07.009.
- 752
- 753
- 754
- 755
- 756
- 757
- 758
- 759

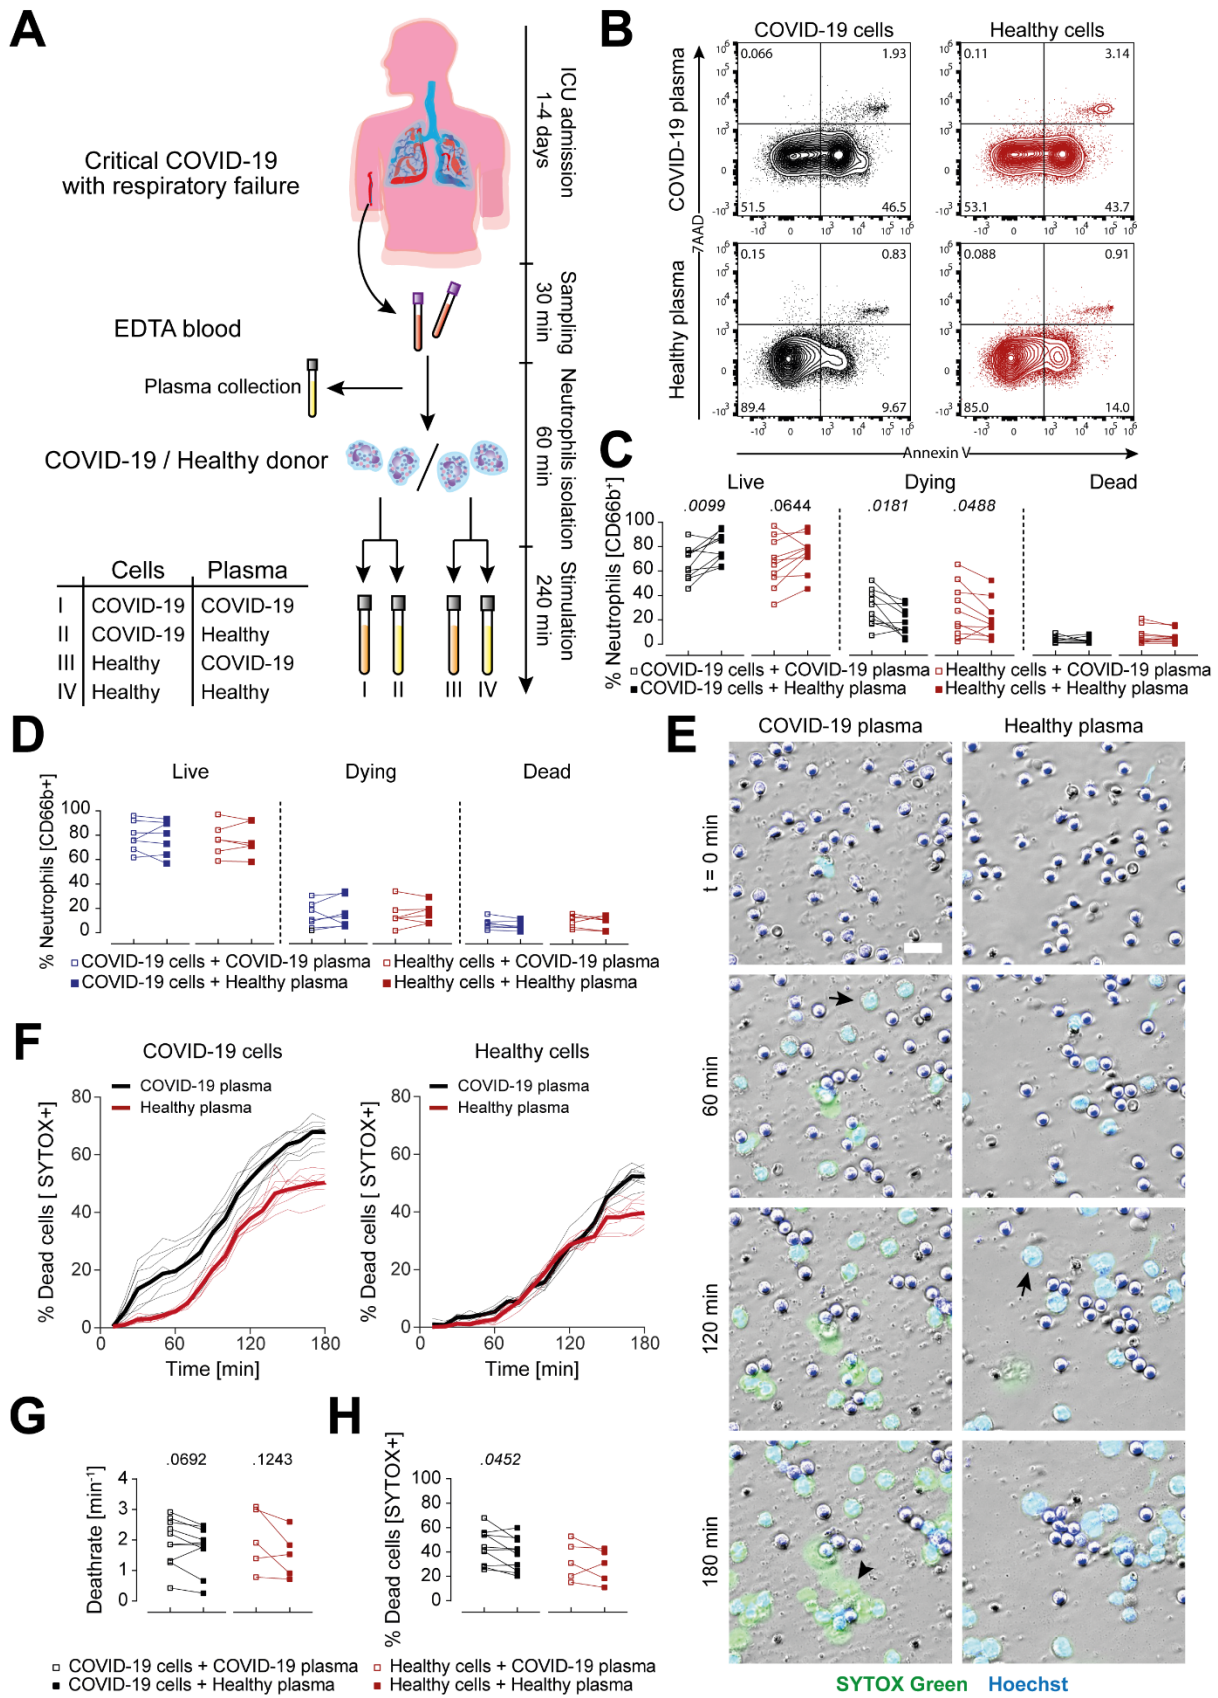

761 **Figure 1. COVID-19 acute phase plasma induces lytic RCD of neutrophils**

762 **(A)** Experimental overview. **(B and C)** Representative flow cytometry plots of acute COVID-  
763 19 (n=10) and healthy donor (n=10) neutrophils stimulated with auto- or heterologous plasma  
764 for 4 h (B) and quantification of live (Annexin V-/7AAD-), dying (Annexin V+/7AAD-) and dead  
765 (Annexin V+/7AAD+) neutrophils (C). **(D)** Quantification of live, dying and dead recovery  
766 COVID-19 (n=7) or healthy donor (n=6) neutrophils stimulated with auto- or heterologous  
767 plasma for 4 h. **(E)** Representative time lapse microscopy of acute COVID-19 neutrophils  
768 stimulated with auto- or heterologous plasma for 3 h. Cells were stained with Hoechst 33342  
769 (blue) and SYTOX™ green. Images were taken every ten minutes. Scale bar, 30 µm. Arrows  
770 indicate cells with membrane breakdown, arrowheads indicate total cell lysis. **(F)**  
771 Representative cell death curve. Thin lines are FOV (n=8) per condition and thick line is mean  
772 of FOVs. Left: COVID-19 neutrophils, right: healthy neutrophils. **(G and H)** Quantification of  
773 cell death rate (G) and (H) proportion at 3 h of COVID-19 (n=10) or healthy neutrophils (n=5)  
774 stimulated with auto- or heterologous plasma. See also Videos 1 and 2. Connected squares  
775 represent one donor. Statistics were calculated by paired t-test or Wilcoxon signed-rank test.  
776 P values are indicated within the graphs. FOV, field of view.

777

778

779

780

781

782

783

784

785

786

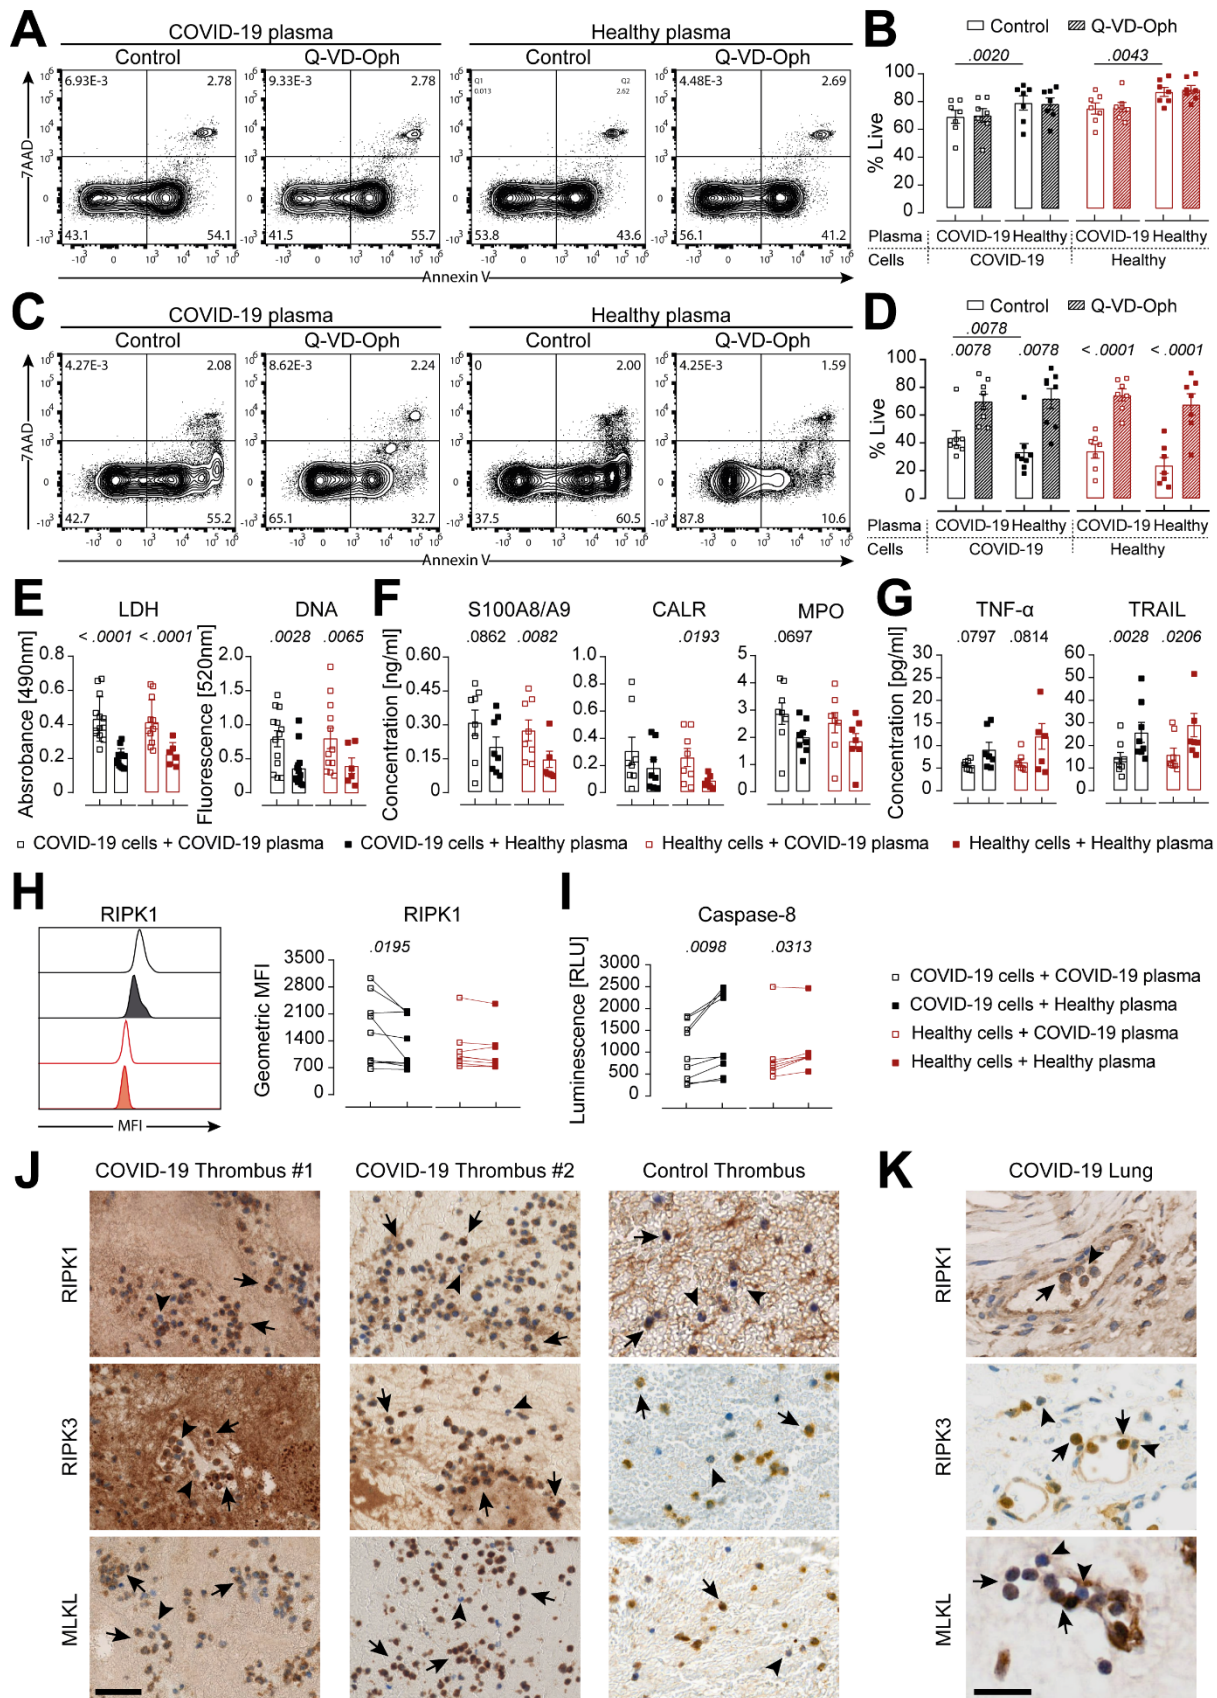

788 **Figure 2. Neutrophil necroptosis via the RIPK1-RIPK3-MLKL axis**

789 **(A-D)** Representative flow cytometry plots at 4 h (A) or 18 h post stimulation (C) and  
790 quantification of COVID-19 (n=7-8) or healthy donor (n=7) neutrophils stimulated with auto- or  
791 heterologous plasma, untreated or treated with Q-VD-Oph for 4 h (B) or 18 h (D). **(E-G)**  
792 Analysis of LDH and DNA (E) as well as DAMPs (F) and cytokines (G) in supernatants of  
793 COVID-19 (n=7-13) or healthy donor (n=6-7) neutrophils stimulated with auto- or heterologous  
794 plasma for 4 h. **(H and I)** Representative histogram and quantification of GMFI of intracellular  
795 RIPK1 expression and caspase-8 activity (I) of COVID-19 (n=9) or healthy donor (n=6-7)  
796 neutrophils stimulated with auto- or heterologous plasma for 4 h. Each square or connected  
797 squares represent one donor. Shown are mean  $\pm$  SEM. Statistics were calculated by paired t-  
798 test or Wilcoxon signed-rank test. P values are indicated within the graphs. **(J and K)** RIPK1,  
799 RIPK3 and MLKL staining of COVID-19 (n = 2) and non-COVID-19 thrombi (J) as well as  
800 COVID-19 lung biopsies (K). Scale bars, 50  $\mu$ m (J) and 25  $\mu$ m (K). Arrows indicate strong  
801 positive staining, arrowheads indicate negative or weak positive staining. SEM, standard error  
802 of means.

803

804

805

806



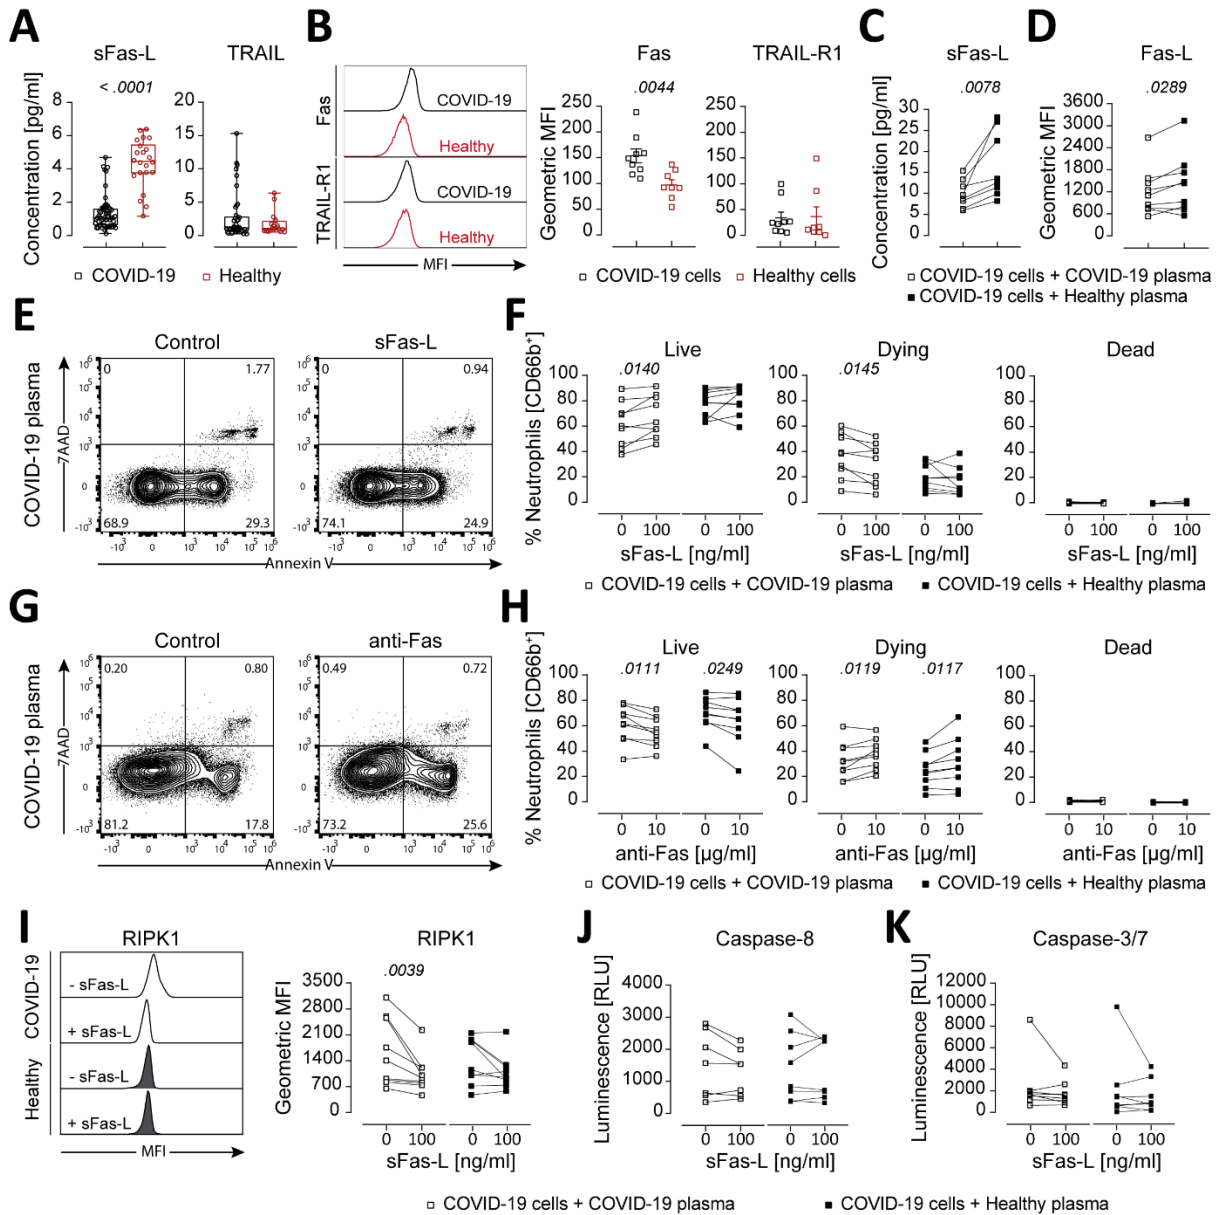

807

808

809

810

811

812

813

814

815

816

817 **Figure 3. Impaired Fas signaling favors RIPK1-driven necroptosis**

818 **(A)** Luminex-based analysis of COVID-19 (sFas-L, n=56/61; TRAIL, n=28/61 detected) and  
819 healthy donors' plasma (sFas-L, n=22/22; TRAIL, n=17/22). **(B)** Representative histogram and  
820 quantification of receptor expression on neutrophils from COVID-19 (n=9) and healthy donors  
821 (n=8). **(C and D)** Luminex-based analysis of sFas-L in supernatants (C) and quantification of  
822 intracellular Fas-L expression (D) of COVID-19 neutrophils (n=8-9) stimulated with auto- or  
823 heterologous plasma for 4 h. **(E and F)** Representative flow cytometry plots (E) and  
824 quantification of live (Annexin V-/7AAD-), dying (Annexin V+/7AAD-) and dead (Annexin  
825 V+/7AAD+) COVID-19 neutrophils (n=9) stimulated with auto- or heterologous plasma and  
826 with or without 100 ng/ml sFas-L for 4 h (F). **(G and H)** Representative flow cytometry plots  
827 (G) and quantification of live, dying and dead COVID-19 neutrophils (n=9) stimulated with  
828 auto- or heterologous plasma and with or without 10 µg/ml anti-Fas for 4 h. **(I-K)**  
829 Representative histogram and quantification of GMFI of intracellular RIPK1 expression (I),  
830 caspase-8 activity (J) or caspase-3/7 activity (K) of COVID-19 neutrophils (n=8-9) stimulated  
831 with auto- or heterologous plasma and with or without 100 ng/ml sFas-L for 4 h. Each dot,  
832 square or connected squares represent one donor. Shown are mean ± SEM. Statistics were  
833 calculated by unpaired t-test, Mann-Whitney, paired t-test or Wilcoxon signed-rank test. P  
834 values are indicated within the graphs. SEM, standard error of means.

835

836

837

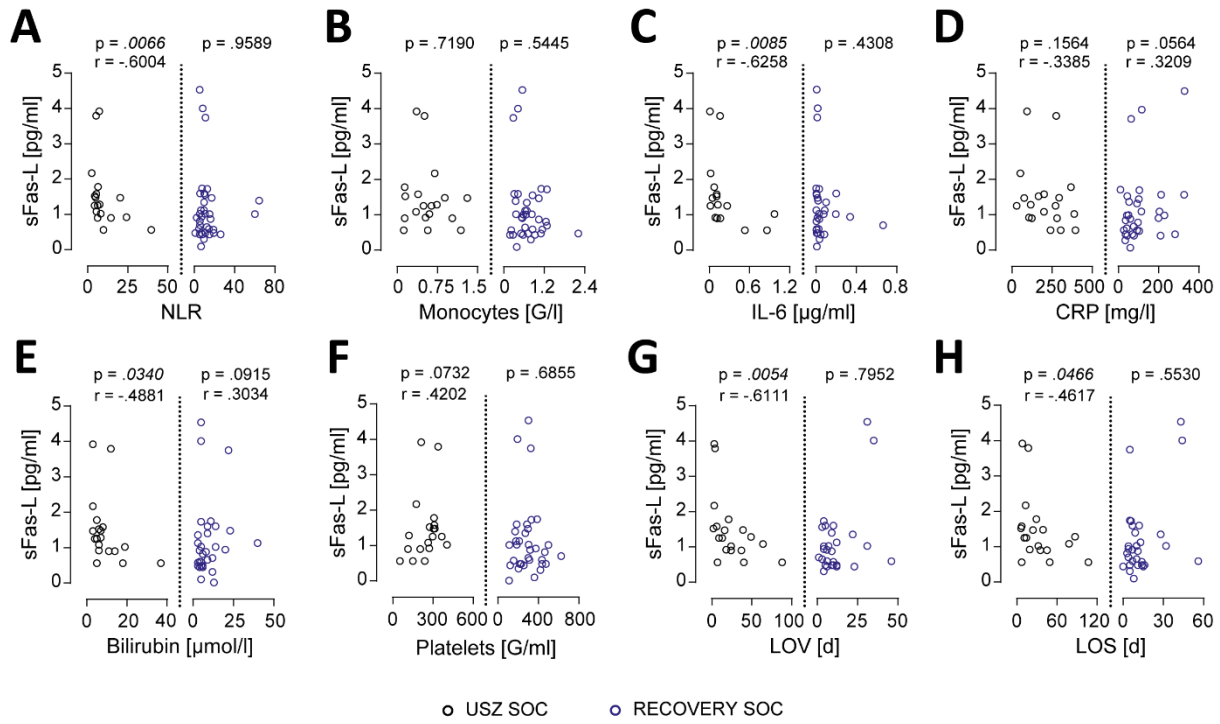

838

839

840

841

842

843

844

845

846

847

848

849

850

851

852

853

854

855

856

857

858 **Figure 4. Correlation of low sFas-L levels with disease severity and abolishment by**  
859 **RECOVERY SOC**

860 **(A-H)** Correlation analysis of plasma sFas-L levels with NLR (A), monocytes (B), IL-6 (C), CRP  
861 (D), bilirubin (E), platelets (F), LOV (G) and LOS (H) in the USZ (n=19) and RECOVERY SOC  
862 (n=36) group. Each dot represents one donor for which sFas-L was detected (n=55). One  
863 patient from the RECOVERY SOC group received dexamethasone only after experimental  
864 sampling and was excluded from correlation analysis. Statistics were calculated by non-  
865 parametric Spearman correlation.
